# Supplementary material for: Genes Involved by Dexamethasone in Prevention of Long-Term Memory Impairment Caused by Lipopolysaccharide-Induced Neuroinflammation
Source: MDPI journal article supplement (doi:10.3390/biomedicines11102595), 2023-09-22
Supplement: s1 [file s1]

Supplementary Materials: Additional Materials 1,2

Supplementary Materials: Additional Materials 1: The full original images of western blots with legends

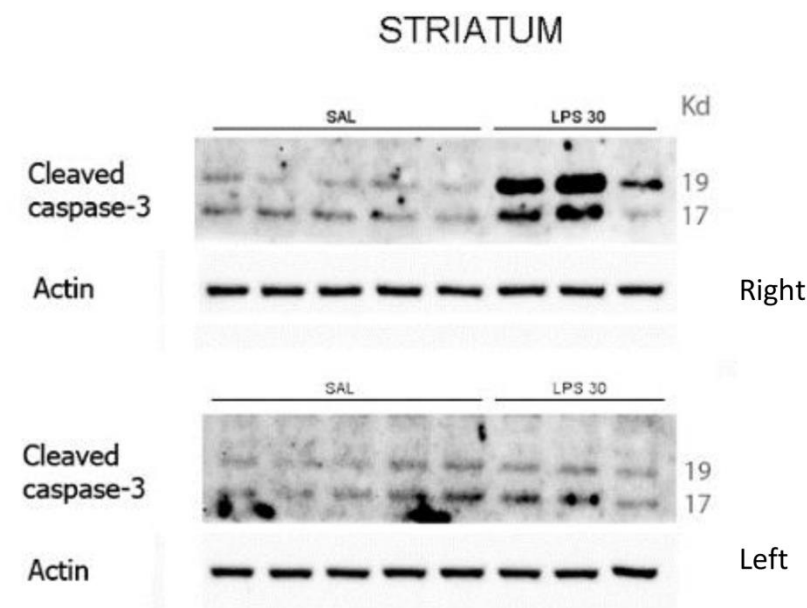

Pro-inflammatory-active caspase-3 P19 presented on immunoblot on the Figure 1 (b) in the manuscript, and both forms presented on the original blots here.

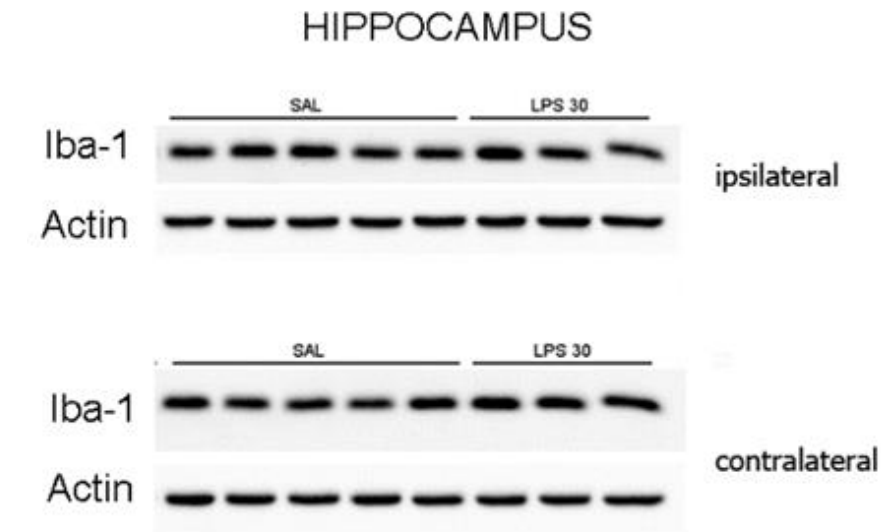

Supplementary Materials: Additional Materials 2: Representative IHC images of the right and left striatum.

Right striatum

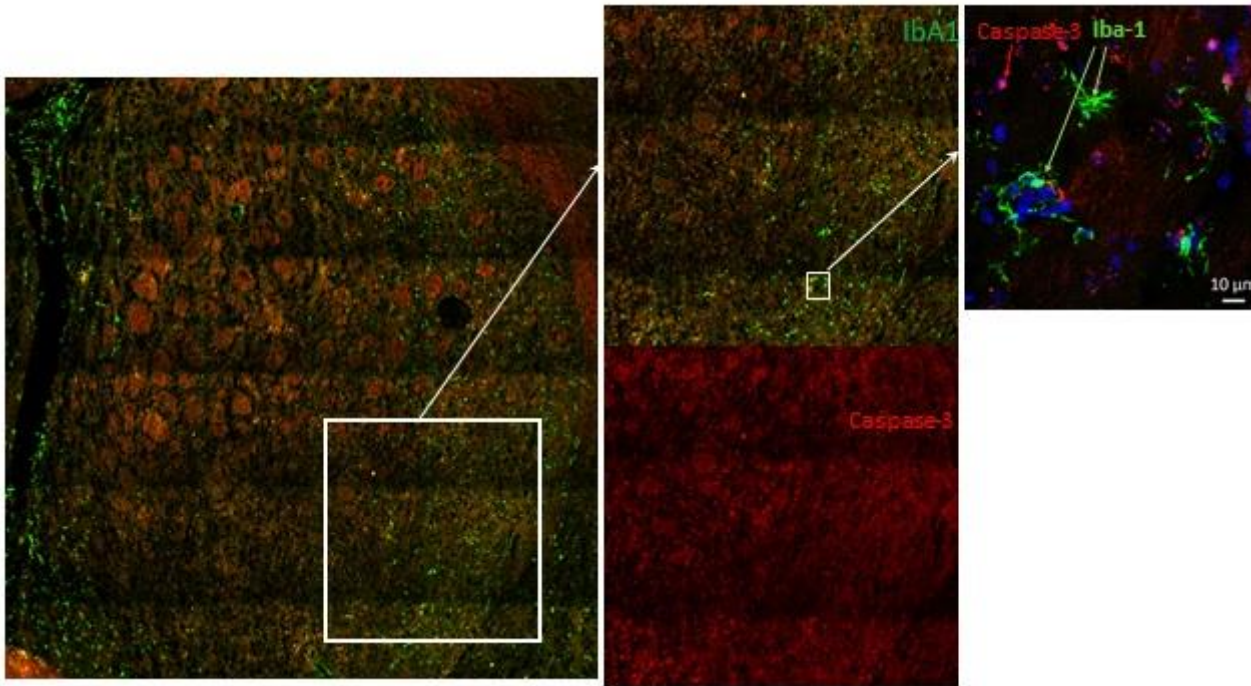

## Left striatum

In contrast to the right striatum, no cells expressing active caspase-3 were found in the left striatum.

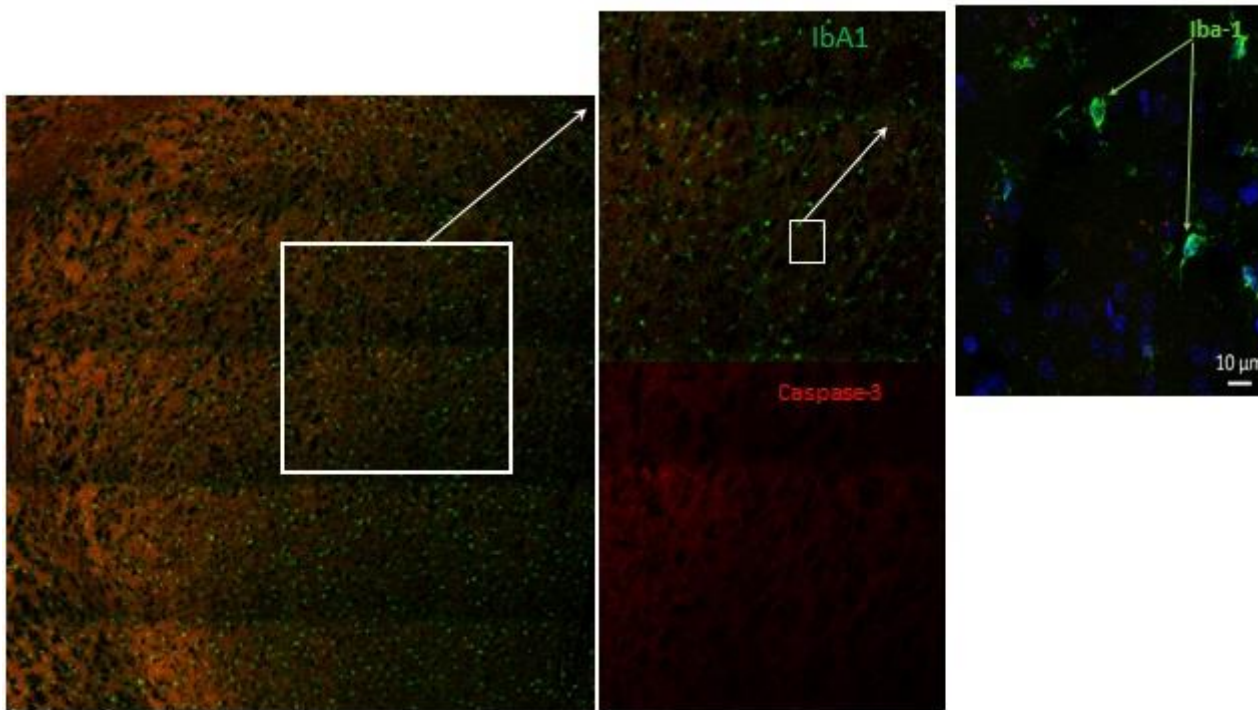

# Supplementary Materials: Tables 1-5

Supplementary Materials, Table 1: List of differentially expressed genes with  $\text{padj} < 0.05$  and  $|\log_2\text{FC}| \geq 1$  in the hippocampus of LPS vs. SAL

| Ensembl gene ID         | Pos                   | Gene symbol | $\log_2\text{FC}$ | pvalue   | padj     |
|-------------------------|-----------------------|-------------|-------------------|----------|----------|
| 1. ENSRNOG00000000768   | 20:1876173-1897814    | Ubd         | 6.58              | 2.62E-08 | 2.16E-05 |
| 2. ENSRNOG000000024899  | 14:15253125-15258207  | Cxcl13      | 5.84              | 2.07E-17 | 2.94E-14 |
| 3. ENSRNOG000000032708  | 20:4039413-4049711    | RT1-Bb      | 5.7               | 4.94E-13 | 5.53E-10 |
| 4. ENSRNOG000000033215  | 20:4087618-4097190    | RT1-Db1     | 4.48              | 1.07E-23 | 2.41E-20 |
| 5. ENSRNOG000000032844  | 20:4127644-4132616    | RT1-Da      | 4.4               | 7.29E-29 | 3.81E-25 |
| 6. ENSRNOG00000000451   | 20:4066132-4070721    | RT1-Ba      | 4.19              | 6.37E-23 | 1.25E-19 |
| 7. ENSRNOG000000018735  | 18:56071478-56080849  | Cd74        | 3.86              | 2.45E-27 | 7.67E-24 |
| 8. ENSRNOG000000004649  | 3:121876263-121882726 | Il1b        | 3.5               | 1.84E-10 | 1.80E-07 |
| 9. ENSRNOG000000030431  | 20:4106189-4125387    | RT1-Db2     | 3.41              | 4.28E-05 | 1.18E-02 |
| 10. ENSRNOG000000042220 | 3:146484238-146491837 | Vsx1        | 3.29              | 7.59E-07 | 4.10E-04 |
| 11. ENSRNOG000000002217 | 14:10692764-10714524  | Plac8       | 3.15              | 4.12E-06 | 1.70E-03 |
| 12. ENSRNOG000000046834 | 9:9721105-9747167     | C3          | 3.02              | 6.08E-22 | 1.06E-18 |
| 13. ENSRNOG000000037167 | 8:119260618-119265157 | Rtp3        | 2.89              | 2.36E-04 | 4.20E-02 |
| 14. ENSRNOG000000033984 | 5:154037202-154058880 | Ifnlr1      | 2.68              | 1.23E-13 | 1.49E-10 |
| 15. ENSRNOG000000014464 | 16:85275678-85306366  | Tnfsf13b    | 2.56              | 8.42E-08 | 5.89E-05 |
| 16. ENSRNOG000000002659 | 10:5213350-5260608    | Ciita       | 2.27              | 5.36E-07 | 3.00E-04 |
| 17. ENSRNOG000000016294 | 4:157383052-157408176 | Cd4         | 2.15              | 5.25E-24 | 1.37E-20 |
| 18. ENSRNOG000000012789 | 19:55176258-55183557  | Mlnr        | 2.11              | 5.03E-06 | 2.02E-03 |
| 19. ENSRNOG000000033444 | 16:81803110-81822716  | F10         | 2.03              | 9.87E-07 | 5.16E-04 |
| 20. ENSRNOG000000014227 | 1:103298174-103323476 | Mrgprx3     | 1.87              | 1.84E-07 | 1.11E-04 |
| 21. ENSRNOG000000024000 | 1:89314558-89329418   | Cd22        | 1.79              | 3.19E-09 | 2.94E-06 |
| 22. ENSRNOG000000008134 | 10:12046541-12056311  | Mefv        | 1.55              | 2.16E-04 | 3.94E-02 |
| 23. ENSRNOG000000046254 | 9:9431860-9585865     | Adgre1      | 1.5               | 1.56E-16 | 2.04E-13 |
| 24. ENSRNOG000000001480 | 12:25497104-25506300  | Ncf1        | 1.32              | 8.65E-08 | 5.89E-05 |
| 25. ENSRNOG000000017980 | 1:198744050-198781750 | Itgal       | 1.19              | 8.47E-05 | 2.01E-02 |
| 26. ENSRNOG000000000187 | 7:119554354-119568776 | Csf2rb      | 1.07              | 1.81E-05 | 5.90E-03 |
| 27. ENSRNOG000000001959 | 11:37891156-37914983  | Mx1         | 1.02              | 2.43E-04 | 4.27E-02 |
| 28. ENSRNOG000000001216 | 20:11436267-11482051  | Trpm2       | 0.95              | 7.74E-12 | 8.09E-09 |
| 29. ENSRNOG000000007350 | 7:119783849-119797098 | Rac2        | 0.95              | 5.56E-05 | 1.40E-02 |

|     |                    |                       |           |       |          |          |
|-----|--------------------|-----------------------|-----------|-------|----------|----------|
| 30. | ENSRNOG00000012972 | 4:148398892-148446303 | Alox5     | -0.96 | 1.43E-04 | 2.76E-02 |
| 31. | ENSRNOG00000031207 | 4:40161285-40169564   | LOC500035 | -1.04 | 2.33E-27 | 7.67E-24 |
| 32. | ENSRNOG00000002979 | 13:83403264-83425641  | Tbx19     | -1.06 | 1.93E-04 | 3.60E-02 |
| 33. | ENSRNOG00000047459 | 17:43734461-43735120  | H1f4      | -1.98 | 1.25E-05 | 4.35E-03 |

Supplementary Materials, Table 2: List of differentially expressed genes with  $\text{padj} < 0.05$  and  $|\log_2\text{FC}| \geq 1$  in the hippocampus of DEX+LPS vs. DEX+SAL

|     | Ensembl gene ID    | Pos                   | Gene symbol | $\log_2\text{FC}$ | pvalue   | padj     |
|-----|--------------------|-----------------------|-------------|-------------------|----------|----------|
| 1.  | ENSRNOG00000024899 | 14:15253125-15258207  | Cxcl13      | 7.4               | 3.61E-12 | 3.62E-10 |
| 2.  | ENSRNOG00000032708 | 20:4039413-4049711    | RT1-Bb      | 6.4               | 2.48E-25 | 9.25E-23 |
| 3.  | ENSRNOG00000000451 | 20:4066132-4070721    | RT1-Ba      | 5.7               | 4.30E-19 | 7.85E-17 |
| 4.  | ENSRNOG00000033215 | 20:4087618-4097190    | RT1-Db1     | 5.6               | 3.50E-20 | 7.24E-18 |
| 5.  | ENSRNOG00000032844 | 20:4127644-4132616    | RT1-Da      | 5.6               | 4.96E-18 | 7.84E-16 |
| 6.  | ENSRNOG00000018735 | 18:56071478-56080849  | Cd74        | 5.3               | 1.52E-15 | 1.96E-13 |
| 7.  | ENSRNOG00000026762 | 20:3889370-3892449    | RT1-DOa     | 4.9               | 1.65E-05 | 5.30E-04 |
| 8.  | ENSRNOG00000000768 | 20:1876173-1897814    | Ubd         | 4.1               | 3.30E-06 | 1.29E-04 |
| 9.  | ENSRNOG00000037167 | 8:119260618-119265157 | Rtp3        | 3.7               | 7.13E-06 | 2.52E-04 |
| 10. | ENSRNOG00000004649 | 3:121876263-121882726 | Il1b        | 3.6               | 1.32E-10 | 1.13E-08 |
| 11. | ENSRNOG00000046834 | 9:9721105-9747167     | C3          | 3.2               | 7.86E-23 | 2.23E-20 |
| 12. | ENSRNOG00000002659 | 10:5213350-5260608    | Ciita       | 3.2               | 1.87E-08 | 1.11E-06 |
| 13. | ENSRNOG00000017485 | 5:58943027-58950373   | Cd72        | 3.2               | 1.47E-05 | 4.78E-04 |
| 14. | ENSRNOG00000001724 | 11:73936750-73963852  | Atp13a3     | 2.7               | 1.33E-07 | 6.81E-06 |
| 15. | ENSRNOG00000004947 | 7:15024693-15027933   | Zfp871      | 2.7               | 1.55E-25 | 6.09E-23 |
| 16. | ENSRNOG00000016921 | 10:88378751-88389347  | Klhl11      | 2.6               | 3.14E-55 | 8.01E-52 |
| 17. | ENSRNOG00000033984 | 5:154037202-154058880 | Ifnlr1      | 2.6               | 1.33E-08 | 8.45E-07 |
| 18. | ENSRNOG00000006569 | 6:147094097-147172813 | Itgb8       | 2.6               | 9.93E-32 | 5.44E-29 |
| 19. | ENSRNOG00000010996 | 14:20960052-20992753  | Mob1b       | 2.5               | 1.74E-24 | 5.80E-22 |
| 20. | ENSRNOG00000042220 | 3:146484238-146491837 | Vsx1        | 2.5               | 8.03E-04 | 1.47E-02 |
| 21. | ENSRNOG00000014227 | 1:103298174-103323476 | Mrgprx3     | 2.4               | 2.77E-11 | 2.53E-09 |
| 22. | ENSRNOG00000010699 | 8:96395317-96401465   | Trim43a     | 2.4               | 2.90E-04 | 6.12E-03 |
| 23. | ENSRNOG00000014464 | 16:85275678-85306366  | Tnfsf13b    | 2.3               | 1.98E-06 | 8.08E-05 |
| 24. | ENSRNOG00000002537 | X:20316893-20454357   | Wnk3        | 2.3               | 1.01E-22 | 2.81E-20 |
| 25. | ENSRNOG00000011623 | 2:41570597-41785792   | Rab3c       | 2.3               | 5.97E-62 | 3.05E-58 |
| 26. | ENSRNOG00000006967 | X:128409472-128453000 | Xiap        | 2.3               | 2.08E-22 | 5.69E-20 |

|     |                    |                       |            |     |          |          |
|-----|--------------------|-----------------------|------------|-----|----------|----------|
| 27. | ENSRNOG00000014511 | 7:131330913-131336183 | Alg10      | 2.3 | 6.28E-22 | 1.66E-19 |
| 28. | ENSRNOG00000011341 | 2:56052643-56101803   | Rictor     | 2.1 | 3.24E-38 | 2.48E-35 |
| 29. | ENSRNOG00000021552 | X:75382598-75407217   | Uppt       | 2.1 | 1.08E-10 | 9.37E-09 |
| 30. | ENSRNOG00000004828 | 3:44270653-44342355   | Acvr1c     | 2.1 | 3.04E-23 | 9.14E-21 |
| 31. | ENSRNOG00000016294 | 4:157383052-157408176 | Cd4        | 2.1 | 1.59E-07 | 8.05E-06 |
| 32. | ENSRNOG00000006583 | 4:95946025-95970666   | Hpgds      | 2.1 | 1.28E-05 | 4.25E-04 |
| 33. | ENSRNOG00000002496 | 11:66316606-66566331  | Stxbp5l    | 2   | 2.86E-73 | 4.39E-69 |
| 34. | ENSRNOG00000014891 | 1:241501679-241557651 | Ptar1      | 2   | 5.31E-21 | 1.18E-18 |
| 35. | ENSRNOG00000026907 | 13:78836587-78852182  | Zbtb37     | 2   | 7.78E-07 | 3.47E-05 |
| 36. | ENSRNOG00000000454 | 20:4020317-4026346    | RT1-DOb    | 2   | 5.50E-05 | 1.50E-03 |
| 37. | ENSRNOG00000003748 | X:54390733-54409466   | RGD1565785 | 2   | 5.44E-04 | 1.05E-02 |
| 38. | ENSRNOG00000003680 | 10:27973681-28187565  | Gabrb2     | 2   | 7.28E-41 | 8.58E-38 |
| 39. | ENSRNOG00000010065 | 15:60803098-60959769  | Dgkh       | 1.9 | 5.26E-24 | 1.71E-21 |
| 40. | ENSRNOG00000047211 | 15:48601266-48670257  | Fzd3       | 1.9 | 1.83E-42 | 2.55E-39 |
| 41. | ENSRNOG00000007706 | 5:124574079-124642569 | Prkaa2     | 1.9 | 1.78E-34 | 1.18E-31 |
| 42. | ENSRNOG00000037919 | X:74200972-74244846   | Chic1      | 1.8 | 9.62E-11 | 8.42E-09 |
| 43. | ENSRNOG00000046515 | 9:6966908-7053387     | St6gal2    | 1.8 | 2.02E-10 | 1.69E-08 |
| 44. | ENSRNOG00000038190 | 18:86420361-86878142  | Dok6       | 1.8 | 2.06E-43 | 3.52E-40 |
| 45. | ENSRNOG00000012176 | 18:68488942-68551558  | Rab27b     | 1.8 | 1.02E-21 | 2.60E-19 |
| 46. | ENSRNOG00000046254 | 9:9431860-9585865     | Adgre1     | 1.8 | 3.47E-10 | 2.85E-08 |
| 47. | ENSRNOG00000014089 | 18:24961245-25025897  | Map3k2     | 1.7 | 2.14E-11 | 1.99E-09 |
| 48. | ENSRNOG00000013624 | 1:102982123-103014388 | Uevld      | 1.7 | 3.73E-10 | 3.00E-08 |
| 49. | ENSRNOG00000014248 | 9:75021790-75528644   | Erbp4      | 1.7 | 2.65E-19 | 4.90E-17 |
| 50. | ENSRNOG00000014486 | 1:245859633-246110218 | Rfx3       | 1.7 | 5.11E-30 | 2.45E-27 |
| 51. | ENSRNOG00000005479 | 3:92640752-92665644   | Slc1a2     | 1.7 | 1.19E-31 | 6.06E-29 |
| 52. | ENSRNOG00000005206 | 7:106717229-107009330 | Kcnq3      | 1.7 | 6.01E-61 | 2.30E-57 |
| 53. | ENSRNOG00000027152 | 14:44038614-44078897  | N4bp2      | 1.7 | 4.45E-12 | 4.34E-10 |
| 54. | ENSRNOG00000010484 | 5:100924622-100977902 | Zdhhc21    | 1.7 | 3.61E-26 | 1.45E-23 |
| 55. | ENSRNOG00000033942 | 10:5930298-6119990    | Grin2a     | 1.7 | 1.98E-57 | 6.06E-54 |
| 56. | ENSRNOG00000005359 | 3:51883559-52120290   | Csrnp3     | 1.7 | 1.95E-19 | 3.69E-17 |
| 57. | ENSRNOG00000009542 | 6:97872831-98157087   | Kcnh5      | 1.6 | 7.40E-05 | 1.93E-03 |
| 58. | ENSRNOG00000001480 | 12:25497104-25506300  | Ncf1       | 1.6 | 1.58E-18 | 2.63E-16 |
| 59. | ENSRNOG00000031669 | 11:79205730-79703736  | Lpp        | 1.6 | 9.57E-04 | 1.70E-02 |

|     |                    |                        |          |     |          |          |
|-----|--------------------|------------------------|----------|-----|----------|----------|
| 60. | ENSRNOG00000014550 | 2:54191538-54360780    | Plcxd3   | 1.6 | 3.19E-05 | 9.34E-04 |
| 61. | ENSRNOG00000017980 | 1:198744050-198781750  | Itgal    | 1.6 | 1.41E-07 | 7.22E-06 |
| 62. | ENSRNOG00000011059 | 3:112684152-112789289  | Ttbk2    | 1.6 | 8.91E-29 | 4.01E-26 |
| 63. | ENSRNOG00000027151 | 11:65747036-65759581   | Lrrc58   | 1.6 | 5.97E-23 | 1.76E-20 |
| 64. | ENSRNOG00000049849 | X:107695491-107723594  | Fam199x  | 1.6 | 1.57E-04 | 3.70E-03 |
| 65. | ENSRNOG00000025160 | 2:224772893-224802997  | Tlcd4    | 1.6 | 1.88E-17 | 2.88E-15 |
| 66. | ENSRNOG00000005578 | 8:32165810-32217476    | Zbtb44   | 1.5 | 2.88E-18 | 4.65E-16 |
| 67. | ENSRNOG00000025539 | 1:235653121-235813030  | Vps13a   | 1.5 | 4.93E-22 | 1.33E-19 |
| 68. | ENSRNOG00000018268 | 19:31524671-31614246   | Hhip     | 1.5 | 6.41E-14 | 7.39E-12 |
| 69. | ENSRNOG00000003434 | 13:60546912-60567882   | Ro60     | 1.5 | 9.80E-09 | 6.37E-07 |
| 70. | ENSRNOG00000011858 | 16:67350539-67595225   | Unc5d    | 1.4 | 5.66E-43 | 8.67E-40 |
| 71. | ENSRNOG00000011460 | 1:13838707-13915594    | Arfgef3  | 1.4 | 6.92E-38 | 5.05E-35 |
| 72. | ENSRNOG00000008846 | 5:16791523-16799776    | Plag1    | 1.4 | 1.18E-18 | 2.03E-16 |
| 73. | ENSRNOG00000000414 | 20:34575950-34684418   | Cep85l   | 1.4 | 5.48E-14 | 6.36E-12 |
| 74. | ENSRNOG00000033531 | 4:15710417-16130848    | Cacna2d1 | 1.4 | 2.49E-34 | 1.59E-31 |
| 75. | ENSRNOG00000013388 | 9:61066175-61134963    | Pgap1    | 1.4 | 9.58E-20 | 1.88E-17 |
| 76. | ENSRNOG00000034190 | 6:138054662-138662511  | Ighm     | 1.4 | 5.62E-05 | 1.52E-03 |
| 77. | ENSRNOG00000016334 | 5:76673990-76756147    | Ptbp3    | 1.4 | 6.64E-18 | 1.04E-15 |
| 78. | ENSRNOG00000002790 | X:75150608-75291938    | Abcb7    | 1.4 | 2.41E-12 | 2.48E-10 |
| 79. | ENSRNOG00000005159 | 7:112673465-112833083  | Fam135b  | 1.4 | 2.57E-12 | 2.62E-10 |
| 80. | ENSRNOG00000004150 | X:2435305-2614770      | Slc9a7   | 1.3 | 7.27E-28 | 3.18E-25 |
| 81. | ENSRNOG00000007528 | 3:48671079-48831467    | Kcnh7    | 1.3 | 2.02E-14 | 2.41E-12 |
| 82. | ENSRNOG00000011696 | 2:56426367-56489415    | Lifr     | 1.3 | 1.73E-31 | 8.53E-29 |
| 83. | ENSRNOG00000032206 | 13:21678512-22590586   | Cntnap5b | 1.3 | 9.93E-09 | 6.42E-07 |
| 84. | ENSRNOG00000016429 | 1:151439409-151783392  | Grm5     | 1.3 | 5.41E-40 | 4.60E-37 |
| 85. | ENSRNOG00000027430 | 9:76621230-76768806    | Ikzf2    | 1.3 | 3.70E-03 | 4.86E-02 |
| 86. | ENSRNOG00000001930 | 11:76747865-76804510   | Ccdc50   | 1.3 | 5.21E-21 | 1.17E-18 |
| 87. | ENSRNOG00000009145 | 15:84324470-84748525   | Klf12    | 1.3 | 1.70E-18 | 2.77E-16 |
| 88. | ENSRNOG00000024000 | 1:89314558-89329418    | Cd22     | 1.3 | 8.18E-05 | 2.11E-03 |
| 89. | ENSRNOG00000005214 | 14:100151210-100217913 | Plek     | 1.2 | 4.28E-12 | 4.20E-10 |
| 90. | ENSRNOG00000026306 | 4:68808359-68819928    | Clec5a   | 1.2 | 1.98E-05 | 6.17E-04 |
| 91. | ENSRNOG00000026962 | 7:53878610-54027892    | Osbpl8   | 1.2 | 5.98E-25 | 2.08E-22 |
| 92. | ENSRNOG00000011508 | X:65040104-65074712    | Zc3h12b  | 1.2 | 1.11E-18 | 1.93E-16 |

|      |                    |                       |                |     |          |          |
|------|--------------------|-----------------------|----------------|-----|----------|----------|
| 93.  | ENSRNOG00000005639 | X:67656253-67829026   | Ar             | 1.2 | 4.94E-14 | 5.78E-12 |
| 94.  | ENSRNOG00000048161 | 8:114916122-114920171 | Tlr9           | 1.2 | 1.22E-06 | 5.26E-05 |
| 95.  | ENSRNOG00000003742 | X:35599258-35771711   | Cdkl5          | 1.2 | 1.79E-21 | 4.50E-19 |
| 96.  | ENSRNOG00000009899 | 2:115866701-115891097 | Skil           | 1.2 | 1.57E-40 | 1.72E-37 |
| 97.  | ENSRNOG00000006515 | X:63343546-63389989   | Klhl15         | 1.2 | 8.43E-04 | 1.53E-02 |
| 98.  | ENSRNOG00000045771 | 4:70252366-70330803   | Chl1           | 1.2 | 1.87E-27 | 7.97E-25 |
| 99.  | ENSRNOG00000046452 | 13:89327794-89433815  | Fcgr2b         | 1.2 | 1.32E-03 | 2.19E-02 |
| 100. | ENSRNOG00000022196 | 9:66568074-66676494   | Bmpr2          | 1.1 | 2.01E-17 | 3.05E-15 |
| 101. | ENSRNOG00000011358 | 3:94352969-94419048   | Hipk3          | 1.1 | 2.70E-38 | 2.18E-35 |
| 102. | ENSRNOG00000004218 | 6:86684413-86713370   | Klhl28         | 1.1 | 5.44E-05 | 1.49E-03 |
| 103. | ENSRNOG00000031495 | 17:22832641-22863966  | Tmem170b       | 1.1 | 3.02E-16 | 4.06E-14 |
| 104. | ENSRNOG00000015692 | 10:62566732-62630155  | Taok1          | 1.1 | 7.35E-25 | 2.50E-22 |
| 105. | ENSRNOG00000034269 | 5:144364269-144436509 | Ago3           | 1.1 | 2.58E-10 | 2.13E-08 |
| 106. | ENSRNOG00000013886 | 2:55835151-55983804   | Fyb1           | 1.1 | 1.21E-09 | 9.06E-08 |
| 107. | ENSRNOG00000008039 | 8:58202821-58253688   | Cul5           | 1.1 | 7.74E-32 | 4.39E-29 |
| 108. | ENSRNOG00000011619 | 8:64573358-64777543   | Myo9a          | 1.1 | 2.06E-29 | 9.57E-27 |
| 109. | ENSRNOG00000012367 | 14:55072200-55081551  | Pcdh7          | 1.1 | 3.89E-17 | 5.79E-15 |
| 110. | ENSRNOG00000011063 | 13:56015901-56236677  | Dennd1b        | 1.1 | 3.61E-07 | 1.71E-05 |
| 111. | ENSRNOG00000013281 | 18:1970914-2094920    | Mib1           | 1.1 | 2.36E-42 | 3.02E-39 |
| 112. | ENSRNOG00000048686 | 9:8349033-8442298     | AABR07066379.1 | 1.1 | 2.66E-05 | 7.99E-04 |
| 113. | ENSRNOG00000042679 | 1:260732485-260830854 | Lcor           | 1.1 | 6.15E-15 | 7.66E-13 |
| 114. | ENSRNOG00000013412 | 9:71230108-71293435   | Creb1          | 1.1 | 1.94E-04 | 4.40E-03 |
| 115. | ENSRNOG00000013884 | 16:23447366-23781604  | Psd3           | 1   | 5.32E-40 | 4.60E-37 |
| 116. | ENSRNOG00000012759 | 9:30515089-30844199   | Col19a1        | 1   | 3.52E-09 | 2.47E-07 |
| 117. | ENSRNOG00000029662 | 16:9194424-9430743    | Wdfy4          | 1   | 2.26E-07 | 1.10E-05 |
| 118. | ENSRNOG00000037563 | 10:56268720-56270640  | Cd68           | 1   | 1.90E-03 | 2.92E-02 |
| 119. | ENSRNOG00000005957 | 15:11836286-11912916  | Slc4a7         | 1   | 1.41E-08 | 8.92E-07 |
| 120. | ENSRNOG00000009196 | 3:21623041-21670014   | Rc3h2          | 1   | 2.17E-19 | 4.06E-17 |
| 121. | ENSRNOG00000006980 | 5:9230984-9257934     | Vcpip1         | 1   | 1.38E-18 | 2.32E-16 |
| 122. | ENSRNOG00000025937 | 8:21448618-21458379   | Zfp26          | 1   | 1.40E-13 | 1.58E-11 |
| 123. | ENSRNOG00000002863 | 13:71906702-72367980  | Cacna1e        | 1   | 4.11E-36 | 2.86E-33 |
| 124. | ENSRNOG00000000277 | 20:27366213-27437427  | Tet1           | 1   | 1.75E-05 | 5.56E-04 |
| 125. | ENSRNOG00000002075 | 14:15059387-15146586  | Cnot6l         | 1   | 4.70E-21 | 1.11E-18 |



|                          |                       |                |      |          |          |
|--------------------------|-----------------------|----------------|------|----------|----------|
| 126. ENSRNOG00000004378  | 10:98576039-98644938  | Abca5          | 1    | 1.85E-09 | 1.34E-07 |
| 127. ENSRNOG000000046969 | 11:71634392-71695000  | AABR07034438.1 | 1    | 1.91E-06 | 7.81E-05 |
| 128. ENSRNOG000000008736 | 13:90967739-90977734  | Slamf8         | 1    | 2.72E-03 | 3.83E-02 |
| 129. ENSRNOG000000022331 | 10:15156207-15159894  | Ccdc78         | -1   | 1.65E-05 | 5.31E-04 |
| 130. ENSRNOG000000022723 | 9:66335492-66447837   | RGD1562029     | -1   | 1.36E-04 | 3.28E-03 |
| 131. ENSRNOG000000014893 | 2:251912368-251970768 | Wdr63          | -1   | 4.23E-05 | 1.19E-03 |
| 132. ENSRNOG000000010529 | 1:56653938-56683731   | Thbs2          | -1   | 2.20E-03 | 3.28E-02 |
| 133. ENSRNOG000000021437 | 5:155812105-155885829 | AABR07073181.1 | -1   | 1.64E-08 | 1.01E-06 |
| 134. ENSRNOG000000012972 | 4:148398892-148446303 | Alox5          | -1   | 9.88E-06 | 3.36E-04 |
| 135. ENSRNOG000000003952 | 13:44523797-44540516  | AABR07020879.1 | -1   | 1.65E-05 | 5.31E-04 |
| 136. ENSRNOG000000029586 | 8:116776494-116779156 | AC128059.1     | -1   | 1.35E-04 | 3.26E-03 |
| 137. ENSRNOG000000023561 | 4:158224000-158576978 | Ano2           | -1   | 2.17E-03 | 3.23E-02 |
| 138. ENSRNOG000000024172 | 1:52907435-52962388   | T2             | -1   | 6.79E-05 | 1.80E-03 |
| 139. ENSRNOG000000007490 | 5:48303366-48341642   | Gabrr2         | -1.1 | 1.95E-03 | 2.97E-02 |
| 140. ENSRNOG000000025860 | 19:10363108-10380809  | Drc7           | -1.1 | 1.19E-05 | 3.99E-04 |
| 141. ENSRNOG000000047124 | 1:197856903-197858016 | AABR07005775.1 | -1.1 | 1.02E-03 | 1.79E-02 |
| 142. ENSRNOG000000047455 | 6:52345240-52401853   | Cdhr3          | -1.1 | 1.08E-03 | 1.87E-02 |
| 143. ENSRNOG000000026914 | 16:7345978-7408265    | Dnah1          | -1.2 | 1.18E-07 | 6.13E-06 |
| 144. ENSRNOG000000014937 | 2:187102833-187113752 | Lrrc71         | -1.2 | 1.71E-08 | 1.04E-06 |
| 145. ENSRNOG000000008911 | 5:164913906-164927869 | Draxin         | -1.2 | 4.34E-05 | 1.22E-03 |
| 146. ENSRNOG000000037668 | 20:46271689-46305157  | LOC102554658   | -1.3 | 7.76E-08 | 4.16E-06 |
| 147. ENSRNOG000000015101 | 17:21521505-21568440  | Mak            | -1.3 | 1.44E-03 | 2.33E-02 |
| 148. ENSRNOG000000016247 | 9:88964525-89001567   | Daw1           | -1.4 | 3.18E-05 | 9.34E-04 |
| 149. ENSRNOG000000018250 | 1:72882806-72886488   | Tnni3          | -1.4 | 1.66E-03 | 2.60E-02 |
| 150. ENSRNOG000000037206 | 4:152860675-152883210 | Ccdc77         | -1.4 | 2.00E-06 | 8.13E-05 |
| 151. ENSRNOG000000038600 | 1:72874404-72883002   | Dnaaf3         | -1.4 | 2.32E-06 | 9.32E-05 |
| 152. ENSRNOG000000012040 | 17:8570472-8607494    | Slc25a48       | -1.5 | 9.30E-04 | 1.66E-02 |
| 153. ENSRNOG000000012342 | 19:33206026-33424972  | Ttc29          | -1.5 | 9.82E-05 | 2.46E-03 |
| 154. ENSRNOG000000012229 | 1:52887067-52894832   | Tbxt           | -1.5 | 5.72E-04 | 1.10E-02 |
| 155. ENSRNOG000000020132 | 5:173471010-173484986 | Ttll10         | -1.6 | 3.56E-05 | 1.03E-03 |
| 156. ENSRNOG000000032085 | 8:127789048-127834637 | Dlec1          | -1.7 | 8.78E-10 | 6.73E-08 |
| 157. ENSRNOG000000027392 | 3:3724656-3747440     | Ccdc187        | -1.8 | 2.09E-05 | 6.44E-04 |
| 158. ENSRNOG000000015049 | 8:128169191-128266639 | Scn5a          | -1.8 | 7.91E-05 | 2.04E-03 |

|                         |                       |        |      |          |          |
|-------------------------|-----------------------|--------|------|----------|----------|
| 159. ENSRNOG00000047459 | 17:43734461-43735120  | H1f4   | -1.8 | 4.77E-05 | 1.33E-03 |
| 160. ENSRNOG00000049495 | 7:143345201-143353925 | Krt71  | -1.9 | 1.23E-03 | 2.07E-02 |
| 161. ENSRNOG00000001193 | 20:10757854-10844178  | Hsf2bp | -2.6 | 1.02E-04 | 2.55E-03 |

Supplementary Materials, Table 3: venn\_result27926

| Names                                 | total | elements           |
|---------------------------------------|-------|--------------------|
| LPS vs. SAL _ DEX+LPS vs. DEX+SAL     | 22    | ENSRNOG00000046834 |
|                                       |       | ENSRNOG00000012972 |
|                                       |       | ENSRNOG00000014227 |
|                                       |       | ENSRNOG00000032708 |
|                                       |       | ENSRNOG00000042220 |
|                                       |       | ENSRNOG00000024899 |
|                                       |       | ENSRNOG00000000768 |
|                                       |       | ENSRNOG00000047459 |
|                                       |       | ENSRNOG00000033984 |
|                                       |       | ENSRNOG00000017980 |
|                                       |       | ENSRNOG00000002659 |
|                                       |       | ENSRNOG00000004649 |
|                                       |       | ENSRNOG00000033215 |
|                                       |       | ENSRNOG00000016294 |
|                                       |       | ENSRNOG00000032844 |
|                                       |       | ENSRNOG00000014464 |
|                                       |       | ENSRNOG00000037167 |
|                                       |       | ENSRNOG00000000451 |
|                                       |       | ENSRNOG00000001480 |
|                                       |       | ENSRNOG00000046254 |
|                                       |       | ENSRNOG00000024000 |
|                                       |       | ENSRNOG00000018735 |
| DEX+LPS vs. DEX+SAL _ DEX+LPS vs. DEX | 84    | ENSRNOG00000004150 |
|                                       |       | ENSRNOG00000010699 |
|                                       |       | ENSRNOG00000004828 |
|                                       |       | ENSRNOG00000018268 |
|                                       |       | ENSRNOG00000005159 |

ENSRNOG00000033531  
ENSRNOG00000007706  
ENSRNOG00000000414  
ENSRNOG00000011460  
ENSRNOG00000025539  
ENSRNOG00000003742  
ENSRNOG00000009899  
ENSRNOG00000014511  
ENSRNOG00000033942  
ENSRNOG00000011508  
ENSRNOG00000006569  
ENSRNOG00000001724  
ENSRNOG00000014089  
ENSRNOG00000010996  
ENSRNOG00000002075  
ENSRNOG00000005206  
ENSRNOG00000037919  
ENSRNOG00000009145  
ENSRNOG00000009542  
ENSRNOG00000006980  
ENSRNOG00000003680  
ENSRNOG00000031495  
ENSRNOG00000016334  
ENSRNOG00000006967  
ENSRNOG00000002496  
ENSRNOG00000026907  
ENSRNOG00000027151  
ENSRNOG00000013884  
ENSRNOG00000011358  
ENSRNOG00000013388  
ENSRNOG00000016921  
ENSRNOG00000004218  
ENSRNOG00000013281

ENSRNOG00000021552  
ENSRNOG00000045771  
ENSRNOG00000011619  
ENSRNOG00000025160  
ENSRNOG00000026962  
ENSRNOG00000034269  
ENSRNOG0000004947  
ENSRNOG00000005578  
ENSRNOG00000012759  
ENSRNOG00000049849  
ENSRNOG00000011341  
ENSRNOG00000046515  
ENSRNOG00000011063  
ENSRNOG00000038190  
ENSRNOG00000042679  
ENSRNOG00000011858  
ENSRNOG00000011623  
ENSRNOG00000000277  
ENSRNOG00000014486  
ENSRNOG00000002537  
ENSRNOG00000001930  
ENSRNOG00000013412  
ENSRNOG00000005639  
ENSRNOG00000010484  
ENSRNOG00000002863  
ENSRNOG00000011696  
ENSRNOG00000047211  
ENSRNOG00000010065  
ENSRNOG00000005479  
ENSRNOG00000015692  
ENSRNOG00000009196  
ENSRNOG00000027152  
ENSRNOG00000022196

|                     |    |                    |
|---------------------|----|--------------------|
|                     |    | ENSRNOG00000032206 |
|                     |    | ENSRNOG00000008846 |
|                     |    | ENSRNOG00000016429 |
|                     |    | ENSRNOG00000014248 |
|                     |    | ENSRNOG00000012176 |
|                     |    | ENSRNOG00000046969 |
|                     |    | ENSRNOG00000005359 |
|                     |    | ENSRNOG00000003434 |
|                     |    | ENSRNOG00000011059 |
|                     |    | ENSRNOG00000025937 |
|                     |    | ENSRNOG00000014891 |
|                     |    | ENSRNOG00000013624 |
|                     |    | ENSRNOG00000007528 |
| <hr/>               |    |                    |
| LPS vs. SAL         | 11 | ENSRNOG00000007350 |
|                     |    | ENSRNOG00000001959 |
|                     |    | ENSRNOG00000002217 |
|                     |    | ENSRNOG00000031207 |
|                     |    | ENSRNOG00000001216 |
|                     |    | ENSRNOG00000030431 |
|                     |    | ENSRNOG00000008134 |
|                     |    | ENSRNOG00000002979 |
|                     |    | ENSRNOG00000033444 |
|                     |    | ENSRNOG00000012789 |
|                     |    | ENSRNOG00000000187 |
| <hr/>               |    |                    |
| DEX+LPS vs. DEX+SAL | 55 | ENSRNOG00000023561 |
|                     |    | ENSRNOG00000014550 |
|                     |    | ENSRNOG00000025860 |
|                     |    | ENSRNOG00000008039 |
|                     |    | ENSRNOG00000018250 |
|                     |    | ENSRNOG00000029662 |
|                     |    | ENSRNOG00000012229 |
|                     |    | ENSRNOG00000031669 |
|                     |    | ENSRNOG00000026306 |

ENSRNOG00000032085  
ENSRNOG00000000454  
ENSRNOG00000015101  
ENSRNOG00000021437  
ENSRNOG00000012342  
ENSRNOG00000004378  
ENSRNOG00000037563  
ENSRNOG00000013886  
ENSRNOG00000034190  
ENSRNOG00000020132  
ENSRNOG00000026762  
ENSRNOG00000048686  
ENSRNOG00000003952  
ENSRNOG00000047455  
ENSRNOG00000006583  
ENSRNOG00000015049  
ENSRNOG00000001193  
ENSRNOG00000027392  
ENSRNOG00000007490  
ENSRNOG00000003748  
ENSRNOG00000010529  
ENSRNOG00000026914  
ENSRNOG00000046452  
ENSRNOG00000047124  
ENSRNOG00000022723  
ENSRNOG00000022331  
ENSRNOG00000005957  
ENSRNOG00000037668  
ENSRNOG00000006515  
ENSRNOG00000024172  
ENSRNOG00000016247  
ENSRNOG00000029586  
ENSRNOG00000027430

ENSRNOG00000049495  
ENSRNOG00000014937  
ENSRNOG00000017485  
ENSRNOG00000005214  
ENSRNOG00000038600  
ENSRNOG00000037206  
ENSRNOG00000002790  
ENSRNOG00000014893  
ENSRNOG00000012040  
ENSRNOG00000048161  
ENSRNOG00000012367  
ENSRNOG00000008911  
ENSRNOG00000008736

---

DEX+LPS vs. LPS

28

ENSRNOG00000008444  
ENSRNOG00000010859  
ENSRNOG00000002941  
ENSRNOG00000003472  
ENSRNOG00000028362  
ENSRNOG00000027233  
ENSRNOG00000004118  
ENSRNOG00000049829  
ENSRNOG00000048800  
ENSRNOG00000023549  
ENSRNOG00000002372  
ENSRNOG00000027564  
ENSRNOG00000033479  
ENSRNOG00000010597  
ENSRNOG00000001547  
ENSRNOG00000018191  
ENSRNOG00000032180  
ENSRNOG00000003643  
ENSRNOG00000003882  
ENSRNOG00000003787

ENSRNOG00000042951  
 ENSRNOG00000024998  
 ENSRNOG00000012470  
 ENSRNOG00000008382  
 ENSRNOG00000008869  
 ENSRNOG00000045622  
 ENSRNOG00000024595  
 ENSRNOG00000010111

Supplementary Materials, Table 4: Enriched GO biological process terms for LPS vs. SAL DEGs

| Term (Category: GOTERM_BP_DIRECT)                                                                       | Count | %     | PValue   | Genes                                            |
|---------------------------------------------------------------------------------------------------------|-------|-------|----------|--------------------------------------------------|
| 1. GO:0019886~antigen processing and presentation of exogenous peptide antigen via MHC class II         | 6     | 18.75 | 2.14E-10 | Cd74, RT1-Ba, RT1-Bb, RT1-Da, RT1-Db1, RT1-Db2   |
| 2. GO:0002504~antigen processing and presentation of peptide or polysaccharide antigen via MHC class II | 5     | 15.63 | 3.35E-10 | RT1-Ba, RT1-Bb, RT1-Da, RT1-Db1, RT1-Db2         |
| 3. GO:0034341~response to interferon-gamma                                                              | 6     | 18.75 | 2.37E-09 | Cd74, Mefv, RT1-Ba, RT1-Db1, Ciita, Ubd          |
| 4. GO:0002503~peptide antigen assembly with MHC class II protein complex                                | 5     | 15.63 | 3.40E-09 | RT1-Ba, RT1-Bb, RT1-Da, RT1-Db1, RT1-Db2         |
| 5. GO:0050778~positive regulation of immune response                                                    | 5     | 15.63 | 5.94E-08 | RT1-Ba, RT1-Bb, RT1-Da, RT1-Db1, RT1-Db2         |
| 6. GO:0050870~positive regulation of T cell activation                                                  | 5     | 15.63 | 3.42E-07 | RT1-Ba, RT1-Bb, RT1-Da, RT1-Db1, RT1-Db2         |
| 7. GO:0002250~adaptive immune response                                                                  | 6     | 18.75 | 6.78E-07 | RT1-Ba, RT1-Bb, RT1-Da, RT1-Db1, RT1-Db2, Adgre1 |
| 8. GO:0006954~inflammatory response                                                                     | 7     | 21.88 | 1.62E-05 | Cxcl13, Mefv, Alox5, Ciita, C3, Il1b, Ncf1       |
| 9. GO:0019882~antigen processing and presentation                                                       | 4     | 12.5  | 5.64E-05 | Cd74, RT1-Ba, RT1-Bb, RT1-Db2                    |
| 10. GO:0006955~immune response                                                                          | 6     | 18.75 | 9.82E-05 | Cd74, RT1-Bb, RT1-Db1, RT1-Db2, Tnfsf13b, Il1b   |
| 11. GO:0090023~positive regulation of neutrophil chemotaxis                                             | 3     | 9.38  | 8.66E-04 | Cd74, Rac2, Il1b                                 |
| 12. GO:0016064~immunoglobulin mediated immune response                                                  | 3     | 9.38  | 1.13E-03 | Cd74, RT1-Da, Csf2rb                             |
| 13. GO:0006959~humoral immune response                                                                  | 3     | 9.38  | 1.35E-03 | RT1-Bb, RT1-Db1, Alox5                           |
| 14. GO:0002469~myeloid dendritic cell antigen processing and presentation                               | 2     | 6.25  | 3.12E-03 | RT1-Da, RT1-Db1                                  |
| 15. GO:0002491~antigen processing and presentation of endogenous peptide antigen via MHC class II       | 2     | 6.25  | 3.12E-03 | RT1-Da, RT1-Db1                                  |
| 16. GO:0043123~positive regulation of I-kappaB kinase/NF-kappaB signaling                               | 4     | 12.5  | 3.35E-03 | Cd74, RT1-Db1, Il1b, Ubd                         |
| 17. GO:0042130~negative regulation of T cell proliferation                                              | 3     | 9.38  | 3.44E-03 | RT1-Ba, RT1-Bb, RT1-Db1                          |
| 18. GO:2000516~positive regulation of CD4-positive, alpha-beta T cell activation                        | 2     | 6.25  | 6.22E-03 | RT1-Da, RT1-Db1                                  |
| 19. GO:0042102~positive regulation of T cell proliferation                                              | 3     | 9.38  | 6.40E-03 | Tnfsf13b, Itgal, Il1b                            |
| 20. GO:0070374~positive regulation of ERK1 and ERK2 cascade                                             | 4     | 12.5  | 6.43E-03 | Cd74, RT1-Db1, C3, Il1b                          |
| 21. GO:0048002~antigen processing and presentation of peptide antigen                                   | 2     | 6.25  | 7.77E-03 | RT1-Ba, RT1-Bb                                   |
| 22. GO:0045622~regulation of T-helper cell differentiation                                              | 2     | 6.25  | 7.77E-03 | RT1-Da, RT1-Db1                                  |



|     |                                                                                                             |   |       |          |                                  |
|-----|-------------------------------------------------------------------------------------------------------------|---|-------|----------|----------------------------------|
| 23. | GO:0001934~positive regulation of protein phosphorylation                                                   | 4 | 12.5  | 8.05E-03 | Cd74, RT1-Db1, C3, Il1b          |
| 24. | GO:0043382~positive regulation of memory T cell differentiation                                             | 2 | 6.25  | 9.32E-03 | RT1-Da, RT1-Db1                  |
| 25. | GO:0032831~positive regulation of CD4-positive, CD25-positive, alpha-beta regulatory T cell differentiation | 2 | 6.25  | 1.09E-02 | RT1-Da, RT1-Db1                  |
| 26. | GO:0050729~positive regulation of inflammatory response                                                     | 3 | 9.38  | 1.16E-02 | Cd74, Mefv, Il1b                 |
| 27. | GO:0031394~positive regulation of prostaglandin biosynthetic process                                        | 2 | 6.25  | 1.55E-02 | Cd74, Il1b                       |
| 28. | GO:0050691~regulation of defense response to virus by host                                                  | 2 | 6.25  | 1.55E-02 | Ifnlr1, Il1b                     |
| 29. | GO:0045657~positive regulation of monocyte differentiation                                                  | 2 | 6.25  | 1.70E-02 | Cd74, RT1-Db1                    |
| 30. | GO:0006691~leukotriene metabolic process                                                                    | 2 | 6.25  | 2.01E-02 | Alox5, Ncf1                      |
| 31. | GO:0046598~positive regulation of viral entry into host cell                                                | 2 | 6.25  | 2.01E-02 | Cd74, RT1-Db1                    |
| 32. | GO:0019221~cytokine-mediated signaling pathway                                                              | 3 | 9.38  | 2.06E-02 | Csf2rb, Ifnlr1, Il1b             |
| 33. | GO:0045893~positive regulation of transcription, DNA-templated                                              | 5 | 15.63 | 2.71E-02 | Cd74, RT1-Db1, Ciita, Il1b, Ncf1 |
| 34. | GO:0045087~innate immune response                                                                           | 4 | 12.5  | 2.90E-02 | Mefv, Mx1, Ciita, C3             |
| 35. | GO:0007166~cell surface receptor signaling pathway                                                          | 3 | 9.38  | 2.93E-02 | Cxcl13, Adgre1, Itgal            |
| 36. | GO:0045582~positive regulation of T cell differentiation                                                    | 2 | 6.25  | 3.83E-02 | Cd74, RT1-Ba                     |
| 37. | GO:0042742~defense response to bacterium                                                                    | 3 | 9.38  | 3.83E-02 | Cxcl13, Ncf1, Plac8              |
| 38. | GO:0002526~acute inflammatory response                                                                      | 2 | 6.25  | 4.13E-02 | Alox5, Il1b                      |
| 39. | GO:0010575~positive regulation of vascular endothelial growth factor production                             | 2 | 6.25  | 4.28E-02 | C3, Il1b                         |
| 40. | GO:0046597~negative regulation of viral entry into host cell                                                | 2 | 6.25  | 4.73E-02 | Cd74, Ciita                      |
| 41. | GO:0050832~defense response to fungus                                                                       | 2 | 6.25  | 4.88E-02 | RT1-Bb, Ncf1                     |

Supplementary Materials, Table 5: Enriched GO biological process terms for DEX+LPS vs. DEX+SAL DEGs

| Term (Category: GOTERM_BP_DIRECT)                                                                       | Cou<br>nt | %    | PValue   | Genes                                                           |
|---------------------------------------------------------------------------------------------------------|-----------|------|----------|-----------------------------------------------------------------|
| 1. GO:0019886~antigen processing and presentation of exogenous peptide antigen via MHC class II         | 8         | 4,79 | 1,69E-10 | Cd74, Fcgr2b, RT1-Ba, RT1-Bb, RT1-DOa, RT1-DOb, RT1-Da, RT1-Db1 |
| 2. GO:0002381~immunoglobulin production involved in immunoglobulin mediated immune response             | 6         | 3,59 | 9,47E-09 | RT1-Ba, RT1-Bb, RT1-DOa, RT1-DOb, RT1-Da, RT1-Db1               |
| 3. GO:0002503~peptide antigen assembly with MHC class II protein complex                                | 6         | 3,59 | 2,61E-08 | RT1-Ba, RT1-Bb, RT1-DOa, RT1-DOb, RT1-Da, RT1-Db1               |
| 4. GO:0002504~antigen processing and presentation of peptide or polysaccharide antigen via MHC class II | 5         | 2,99 | 2,01E-07 | RT1-Ba, RT1-Bb, RT1-DOb, RT1-Da, RT1-Db1                        |
| 5. GO:0050870~positive regulation of T cell activation                                                  | 6         | 3,59 | 7,65E-06 | RT1-Ba, RT1-Bb, RT1-DOa, RT1-DOb, RT1-Da, RT1-Db1               |
| 6. GO:0019882~antigen processing and presentation                                                       | 6         | 3,59 | 2,28E-05 | Cd74, Rab3c, RT1-Ba, RT1-Bb, RT1-DOa, Wdfy4                     |
| 7. GO:0034341~response to interferon-gamma                                                              | 5         | 2,99 | 1,44E-04 | Cd74, RT1-Ba, RT1-Db1, Ciita, Ubd                               |
| 8. GO:0002250~adaptive immune response                                                                  | 7         | 4,19 | 1,49E-04 | RT1-Ba, RT1-Bb, RT1-DOa, RT1-DOb, RT1-Da, RT1-Db1, Adgre1       |
| 9. GO:0034765~regulation of ion transmembrane transport                                                 | 6         | 3,59 | 1,28E-03 | Cacna2d1, Cacna1e, Kcnh5, Kcnh7, Kcnq3, Scn5a                   |
| 10. GO:1901224~positive regulation of NIK/NF-kappaB signaling                                           | 5         | 2,99 | 1,84E-03 | Cd74, Ago3, Il1b, Rc3h2, Tlr9                                   |
| 11. GO:0050852~T cell receptor signaling pathway                                                        | 5         | 2,99 | 5,97E-03 | Dennd1b, Fyb1, RT1-Bb, RT1-Db1, Rc3h2                           |

|                                                                                                               |    |      |          |                                                                            |
|---------------------------------------------------------------------------------------------------------------|----|------|----------|----------------------------------------------------------------------------|
| 12. GO:0046330~positive regulation of JNK cascade                                                             | 5  | 2,99 | 6,87E-03 | Fcgr2b, Taok1, Xiap, Il1b, Ncf1                                            |
| 13. GO:0050776~regulation of immune response                                                                  | 4  | 2,39 | 7,58E-03 | Cd22, Dennd1b, Fcgr2b, Tnfsf13b                                            |
| 14. GO:0006955~immune response                                                                                | 8  | 4,79 | 7,65E-03 | Cd74, Fyb1, RT1-Bb, RT1-Db1, Tnfsf13b, Itgb8, Il1b, Tlr9                   |
| 15. GO:0071363~cellular response to growth factor stimulus                                                    | 5  | 2,99 | 8,13E-03 | Acvr1c, Bmpr2, Creb1, Grin2a, Slc4a7                                       |
| 16. GO:0006468~protein phosphorylation                                                                        | 11 | 6,58 | 1,14E-02 | Taok1, Wnk3, Acvr1c, Bmpr2, Creb1, Cdkl5, Grm5, Hipk3, Mak, Map3k2, Prkaa2 |
| 17. GO:0042391~regulation of membrane potential                                                               | 5  | 2,99 | 1,24E-02 | Gabrb2, Gabrr2, Grin2a, Kcnh5, Kcnh7                                       |
| 18. GO:0002469~myeloid dendritic cell antigen processing and presentation                                     | 2  | 1,19 | 1,48E-02 | RT1-Da, RT1-Db1                                                            |
| 19. GO:0002587~negative regulation of antigen processing and presentation of peptide antigen via MHC class II | 2  | 1,19 | 1,48E-02 | RT1-DOa, RT1-DOb                                                           |
| 20. GO:0002491~antigen processing and presentation of endogenous peptide antigen via MHC class II             | 2  | 1,19 | 1,48E-02 | RT1-Da, RT1-Db1                                                            |
| 21. GO:0043410~positive regulation of MAPK cascade                                                            | 6  | 3,59 | 1,80E-02 | Cd74, RT1-Db1, Ar, Dok6, Grm5, Tlr9                                        |
| 22. GO:0051649~establishment of localization in cell                                                          | 6  | 3,59 | 1,80E-02 | Fcgr2b, Ano2, Cacna1e, Daw1, Kcnq3, Scn5a                                  |
| 23. GO:0048169~regulation of long-term neuronal synaptic plasticity                                           | 3  | 1,79 | 2,09E-02 | Fcgr2b, Grin2a, Grm5                                                       |
| 24. GO:0086048~membrane depolarization during bundle of His cell action potential                             | 2  | 1,19 | 2,22E-02 | Cacna2d1, Scn5a                                                            |
| 25. GO:0016064~immunoglobulin mediated immune response                                                        | 3  | 1,79 | 2,22E-02 | Cd74, Fcgr2b, RT1-Da                                                       |
| 26. GO:0021549~cerebellum development                                                                         | 4  | 2,39 | 2,64E-02 | Fcgr2b, Acvr1c, Scn5a)                                                     |
| 27. GO:0021537~telencephalon development                                                                      | 3  | 1,79 | 2,64E-02 | Erb4, Scn5a,                                                               |
| 28. GO:0006959~humoral immune response                                                                        | 3  | 1,79 | 2,79E-02 | RT1-Bb, RT1-Db1, Alox5                                                     |
| 29. GO:2000516~positive regulation of CD4-positive, alpha-beta T cell activation                              | 2  | 1,19 | 2,94E-02 | RT1-Da, RT1-Db1                                                            |
| 30. GO:0071805~potassium ion transmembrane transport                                                          | 5  | 2,99 | 2,95E-02 | Alg10, Kcnh5, Kcnh7, Kcnq3, Slc9a7                                         |
| 31. GO:0017157~regulation of exocytosis                                                                       | 3  | 1,79 | 3,09E-02 | Rab27b, Rab3c, Stxbp5l                                                     |
| 32. GO:0035556~intracellular signal transduction                                                              | 8  | 4,79 | 3,58E-02 | Taok1, Wnk3, Dgkh, Mak, Map3k2, Myo9a, Plek                                |
| 33. GO:0048002~antigen processing and presentation of peptide antigen                                         | 2  | 1,19 | 3,67E-02 | RT1-Ba, RT1-Bb                                                             |
| 34. GO:0045622~regulation of T-helper cell differentiation                                                    | 2  | 1,19 | 3,67E-02 | RT1-Da, RT1-Db1                                                            |
| 35. GO:0007166~cell surface receptor signaling pathway                                                        | 5  | 2,99 | 3,70E-02 | Cxcl13, Fcgr2b, Adgre1, Erb4, Itgal                                        |
| 36. GO:0050796~regulation of insulin secretion                                                                | 3  | 1,79 | 3,90E-02 | Alox5, Il1b, Rfx3                                                          |
| 37. GO:0006816~calcium ion transport                                                                          | 4  | 2,39 | 3,96E-02 | Atp2a1, Cacna2d1, Cacna1e, Grin2a                                          |
| 38. GO:0007229~integrin-mediated signaling pathway                                                            | 4  | 2,39 | 4,06E-02 | Fyb1, Itgal, Itgb8, Plek                                                   |
| 39. GO:0043382~positive regulation of memory T cell differentiation                                           | 2  | 1,19 | 4,38E-02 | RT1-Da, RT1-Db1                                                            |
| 40. GO:0006612~protein targeting to membrane                                                                  | 3  | 1,79 | 4,60E-02 | Ncf1, Rtp3, Zdhc21                                                         |
| 41. GO:0050871~positive regulation of B cell activation                                                       | 3  | 1,79 | 4,78E-02 | Ighm, Ighn, Tlr9                                                           |
| 42. GO:0009410~response to xenobiotic stimulus                                                                | 9  | 5,38 | 4,81E-02 | Acvr1c, Creb1, C3, Erb4, Fzd3, Grin2a, Hspg2, Il1b, Slc1a2                 |
| 43. GO:0006954~inflammatory response                                                                          | 7  | 4,19 | 4,92E-02 | Cxcl13, Alox5, Ciita, C3, Il1b, Ncf1, Tlr9)                                |

44. GO:0060078~regulation of postsynaptic membrane potential

3 1,79 4,96E-02 Gabrr2, Grin2a, Grm5

---
